# Supplementary material
Source: Springer Nature journal article supplement (https://www.springermedizin.de/resource/supplementary/12970_2012_312_MOESM2_ESM.pdf/9594822)

# Zonulin (stool)

Before and after 14 weeks treatment

n = 23

$P_{Tx} = 0.019$

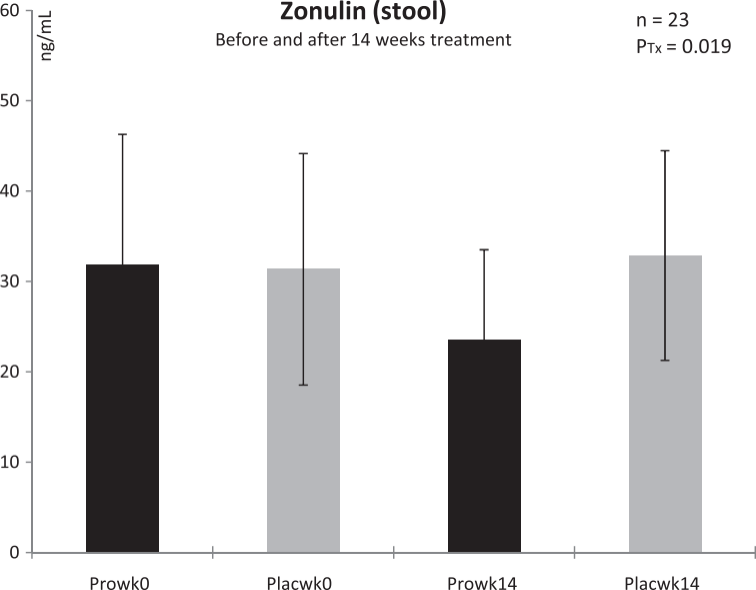

Supplement: MOESM2 [file 9594822]
